# Supplementary material for: Synthesis and characterization of an α-MoO3 nanobelt catalyst and its application in one-step conversion of fructose to 2,5-diformylfuran
Source: Royal Society of Chemistry journal article supplement (doi:10.1039/d1nj02679h), 2021-01-01
Supplement: d1nj02679h1.pdf [file d1nj02679h1.pdf]

Supporting Information

for

**$\alpha$ -MoO<sub>3</sub> nanobelts as an effective  
bifunctional catalyst for one-step conversion  
of fructose to 2,5-diformylfuran under  
atmospheric air**

*Zhenzhen Yang* \*<sup>a,b</sup>, *Bangchong Zhu*<sup>a</sup>, *Yuhan He*<sup>a</sup>, *Genlei Zhang*<sup>a</sup>, *Peng Cui*<sup>a</sup>,

*Jianbo He*<sup>a</sup>

<sup>a</sup> School of Chemistry and Chemical Engineering, Anhui Province Key Laboratory of  
Advanced Catalytic Materials and Reaction Engineering, Anhui Province Key  
Laboratory of Controllable Chemistry Reaction and Material Chemical Engineering,  
Hefei University of Technology, Hefei, 230009, PR China.

<sup>b</sup> School of Materials Science and Technology, Hefei University of Technology,  
Hefei, 230009, PR China.

*\*Corresponding Author: Zhenzhen Yang, E-mail: zzyang@hfut.edu.cn;*

Contents:

1. EDS spectrum of  $\alpha$ -MoO<sub>3</sub>.
2. The ratio of  $O_{\alpha}/(O_{\alpha}+ O_{\beta})$  on the surface of fresh  $\alpha$ -MoO<sub>3</sub>,  $\alpha$ -MoO<sub>3</sub>-air and  $\alpha$ -MoO<sub>3</sub>-N<sub>2</sub>.
3. The results of leaching tests of  $\alpha$ -MoO<sub>3</sub>.
4. SEM and EDS spectra of the used  $\alpha$ -MoO<sub>3</sub>.
5. Effects of reaction temperature and time on the carbon balance of fructose conversion to HMF and DFF under atmospheric air.

1. EDS spectrum of  $\alpha$ -MoO<sub>3</sub>.

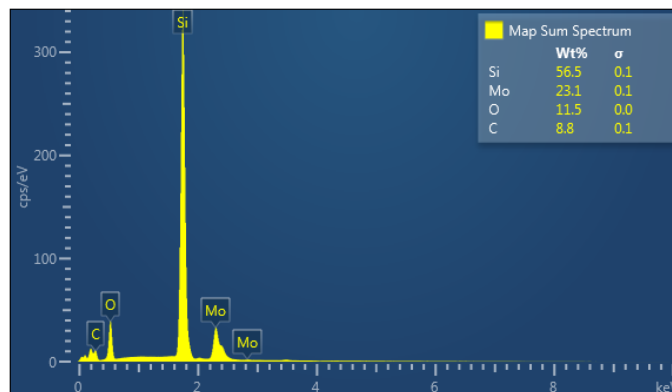

**Figure S1.** EDS spectrum of  $\alpha$ -MoO<sub>3</sub>.

2. The ratio of  $O_{\alpha}/(O_{\alpha}+O_{\beta})$  on the surface of fresh  $\alpha$ - $\text{MoO}_3$ ,  $\alpha$ - $\text{MoO}_3$ -air and  $\alpha$ - $\text{MoO}_3$ - $\text{N}_2$ .

**Table S1.** The ratio of  $O_{\alpha}/(O_{\alpha}+O_{\beta})$  on the surface of fresh  $\alpha$ - $\text{MoO}_3$ ,  $\alpha$ - $\text{MoO}_3$ -air and  $\alpha$ - $\text{MoO}_3$ - $\text{N}_2$ .

|                                          | $O_{\alpha}/(O_{\alpha}+O_{\beta})$ |
|------------------------------------------|-------------------------------------|
| fresh $\alpha$ - $\text{MoO}_3$          | 90.5                                |
| $\alpha$ - $\text{MoO}_3$ -air           | 88.3%                               |
| $\alpha$ - $\text{MoO}_3$ - $\text{N}_2$ | 76%                                 |

3. The results of leaching tests of  $\alpha$ -MoO<sub>3</sub>.

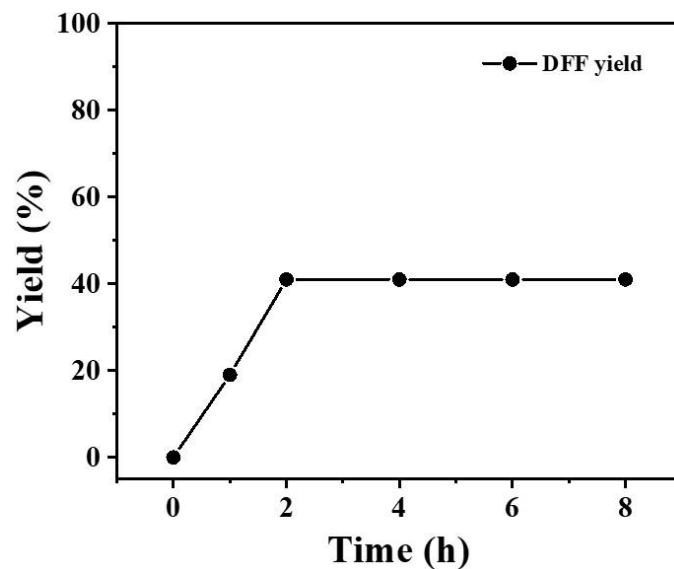

**Figure S2.** Leaching experiments at the optimum conditions for the oxidation of HMF to DFF catalyzed by  $\alpha$ -MoO<sub>3</sub>. Reaction conditions: HMF 0.126 g (1 mmol),  $\alpha$ -MoO<sub>3</sub> 50 mg, DMSO 2 mL, 120 °C.

#### 4. SEM and EDS spectra of the used $\alpha$ -MoO<sub>3</sub>.

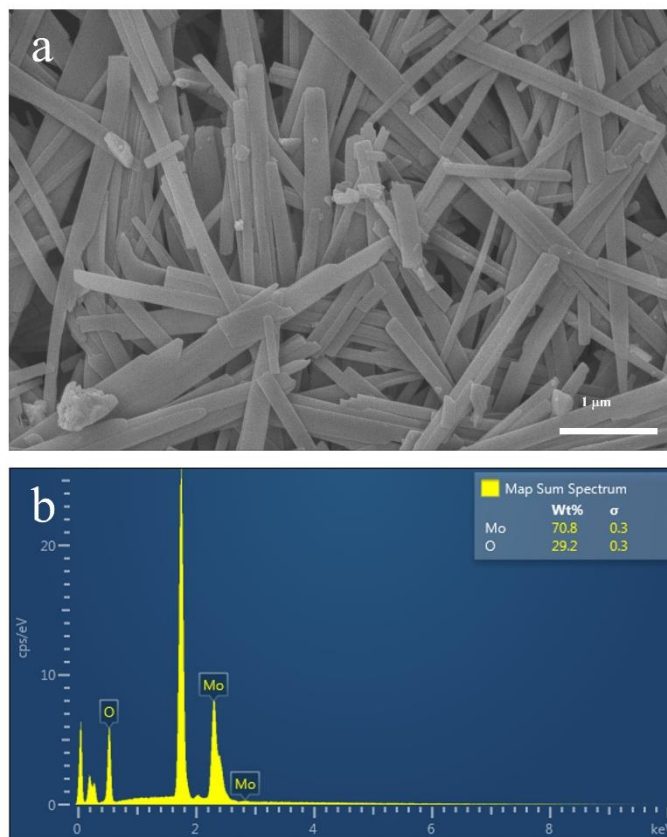

**Figure S3.** SEM and EDS spectra of the used  $\alpha$ -MoO<sub>3</sub>.

5. Effects of reaction temperature and time on the carbon balance of fructose conversion to HMF and DFF under atmospheric air.

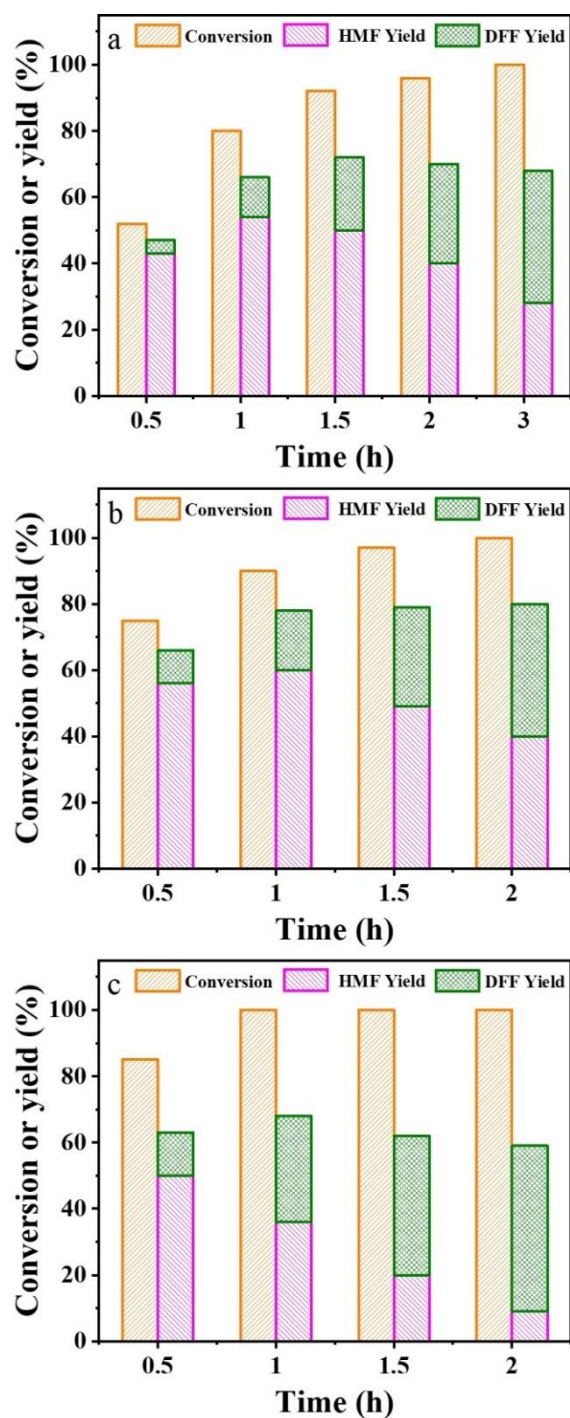

**Figure S4.** Effects of reaction temperature and time on the carbon balance of fructose conversion to HMF and DFF under atmospheric air  
(a) 110 °C, (b) 120 °C and (c) 130 °C.
